# Supplementary material for: Highly efficient removal of humic acid from aqueous solutions by Mg/Al layered double hydroxides–Fe3O4 nanocomposites
Source: Royal Society of Chemistry journal article supplement (doi:10.1039/c4ra02212b), 2014-01-01
Supplement: c4ra02212b1.pdf [file c4ra02212b1.pdf]

## SUPPORTING INFORMATION

### Highly efficient removal of humic acid from aqueous solutions by Mg/Al layered double hydroxides-Fe<sub>3</sub>O<sub>4</sub> nanocomposites

Rui-Xia Wang,<sup>a,b</sup> Tao Wen,<sup>c</sup> Xi-Lin Wu<sup>a</sup> and An-Wu Xu<sup>\*a</sup>

<sup>a</sup>Division of Nanomaterials and Chemistry, Hefei National Laboratory for Physical Sciences at Microscale Department, University of Science and Technology of China, Hefei, 230026, P.R. China. E-mail: anwuxu@ustc.edu.cn

<sup>b</sup>Department of Materials and Chemical Engineering, Center of Chemical Materials and Engineering Experiment, College of Chi Zhou, Chizhou, 247000, P.R. China.

<sup>c</sup>Key Laboratory of Novel Thin Film Solar Cells, Institute of Plasma Physics, Chinese Academy of Sciences, P.O. Box 1126, 230031, Hefei, P.R. China.

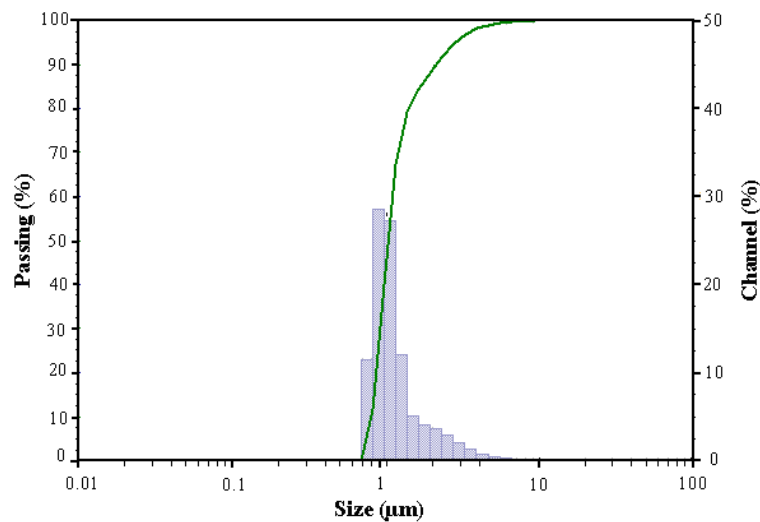

Fig. S1. Size distribution of LDHs-Fe<sub>3</sub>O<sub>4</sub> nanocomposites.

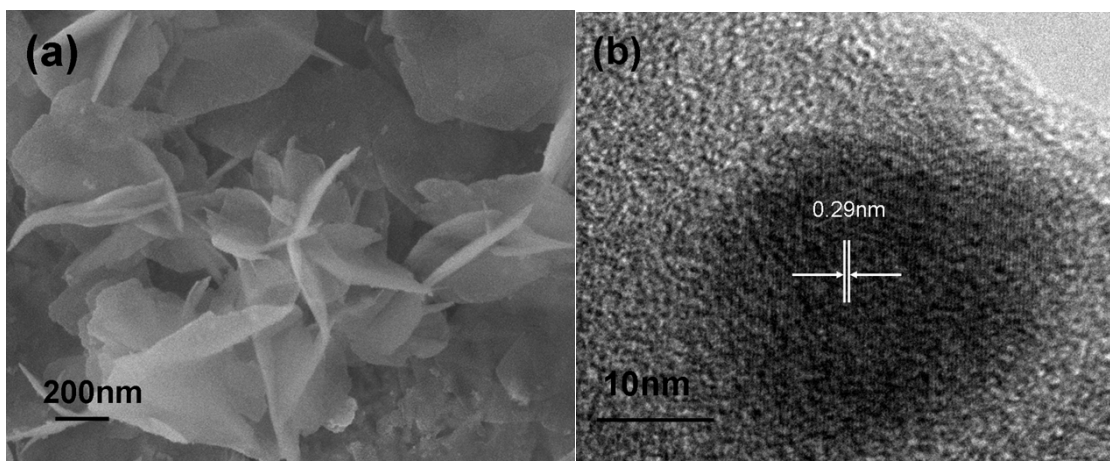

**Fig. S2** SEM image of (a) LDHs-Fe<sub>3</sub>O<sub>4</sub> and HR-TEM image of (b) Fe<sub>3</sub>O<sub>4</sub>.

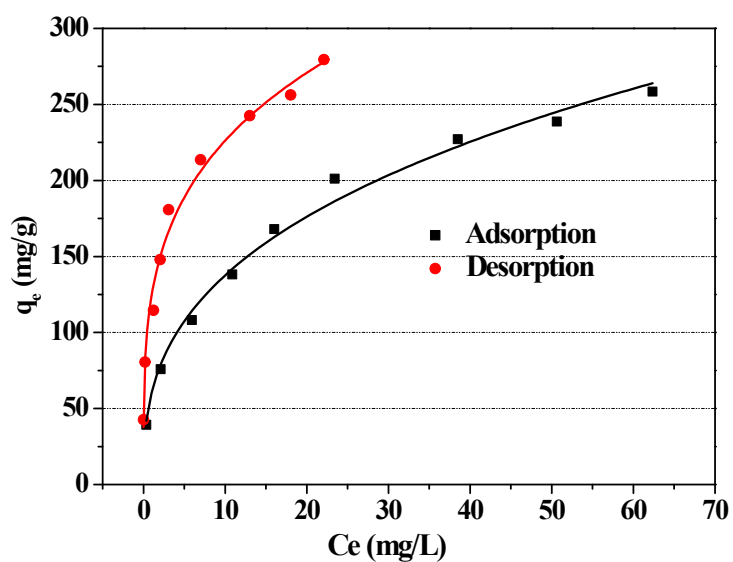

**Fig. S3.** Adsorption and desorption isotherms of HA adsorption on LDHs-Fe<sub>3</sub>O<sub>4</sub>. pH = 5.0 ± 0.1, m/V = 0.5 g/L, and I = 0.01 M NaNO<sub>3</sub>.

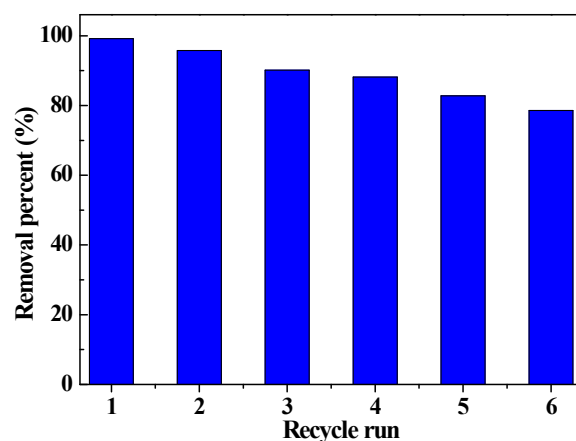

**Fig. S4.** Recycling of LDHs-Fe<sub>3</sub>O<sub>4</sub> in the removal of HA. pH = 5.0 ± 0.1, m/V = 0.5 g/L, and I = 0.01 M NaNO<sub>3</sub>.

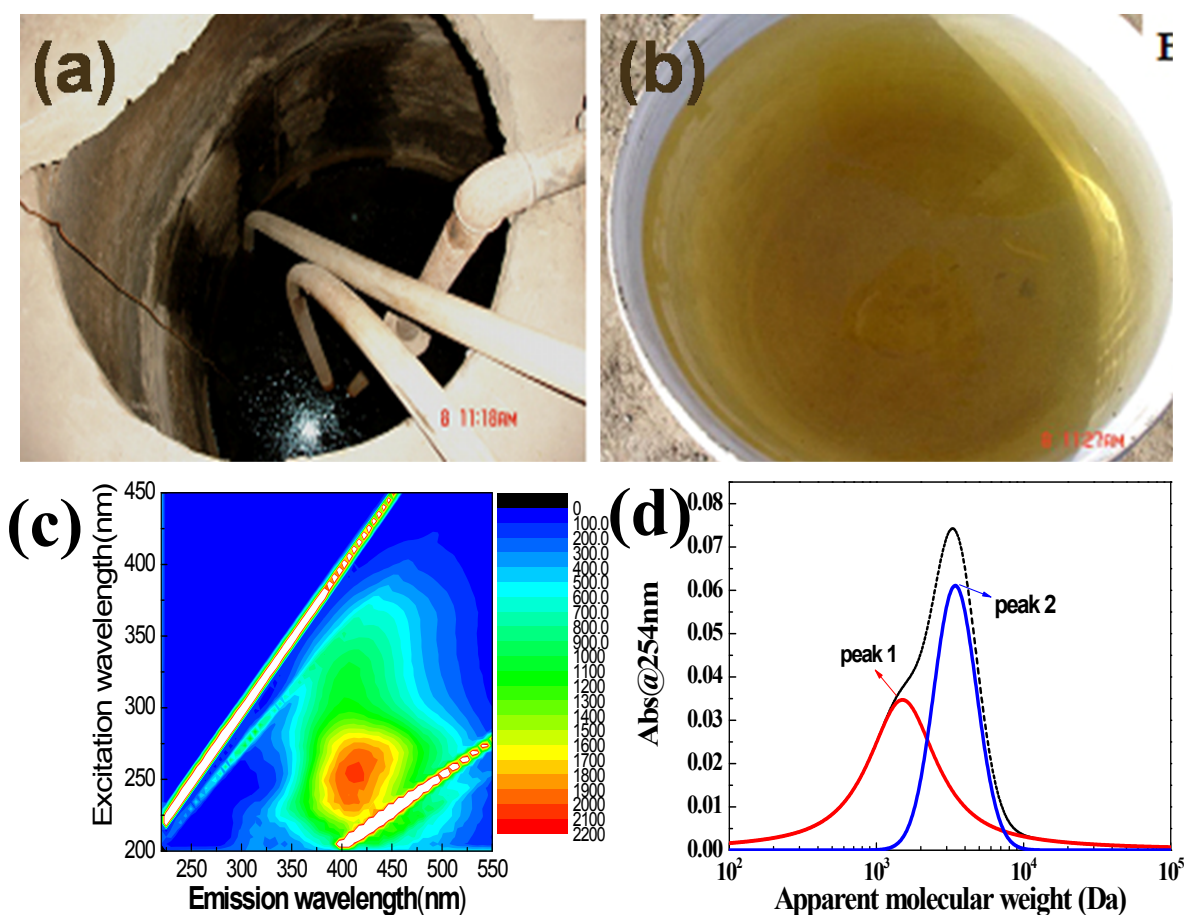

**Fig. S5.** Digital pictures of (a) the natural groundwater well and (b) the color of the groundwater sample, (c) the excitation emission matrix fluorescence spectroscopy of natural groundwater sample, and (d) high performance size exclusion chromatography.

**Table S1** Theoretical and Calculated  $q_e$  Values, Pseudo-Second-Order Rate Constants,  $k_2$ , and

Correlation Coefficient Values ( $R^2$ ). The dosage of the assembly of LDHs- $Fe_3O_4$  adsorbent was 0.5 g/L

| Initial concentration of HA<br>(mg/L) | Theoretical $q_e$ (mg/g) | Calculated $q_e$ (mg/g) | $k_2$ (g/mg/h) | $R^2$  |
|---------------------------------------|--------------------------|-------------------------|----------------|--------|
| 40                                    | 80.91                    | 81.23                   | 0.1471         | 0.9997 |
| 60                                    | 109.5                    | 109.89                  | 0.1999         | 0.9998 |
| 80                                    | 139.02                   | 140.25                  | 0.0736         | 0.9996 |

**Table S2** Comparison of the maximum adsorption capacity of HA on LDHs- $Fe_3O_4$  with other different adsorbents.

| Adsorbents                           | Adsorption capacity<br>(mg/g) | Reference  |
|--------------------------------------|-------------------------------|------------|
| coal fly ash                         | 16.6                          | 12         |
| alumina-pillared clays, Al-<br>PILCs | 23.4                          | 44         |
| fly ash                              | 72                            | 2          |
| activated carbon                     | 2.51                          | 1          |
| aminopropyl functionalized<br>SBA-15 | 117                           | 45         |
| LDHs                                 | 225.60                        | this study |
| LDHs- $Fe_3O_4$                      | 353.82                        | this study |
